# Supplementary material for: Using in vivo oxidation status of one- and two-component redox relays to determine H2O2 levels linked to signaling and toxicity
Source: PubMed Central journal article supplement (PMC5984441; doi:10.1186/s12915-018-0523-6), 2018-06-01
Supplement: 12915_2018_523_MOESM6_ESM.pdf [file 12915_2018_523_MOESM6_ESM.pdf]

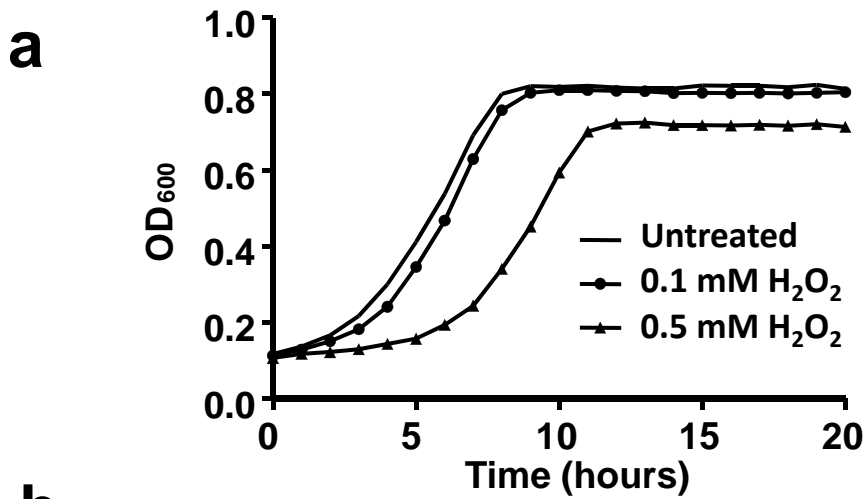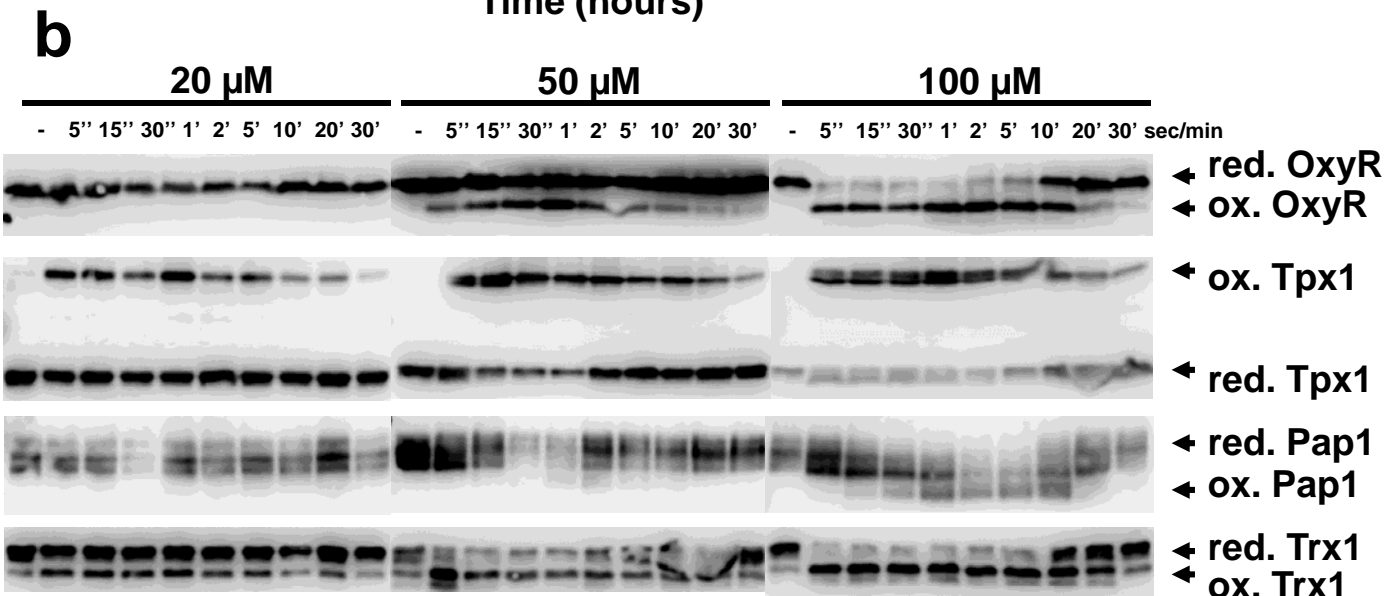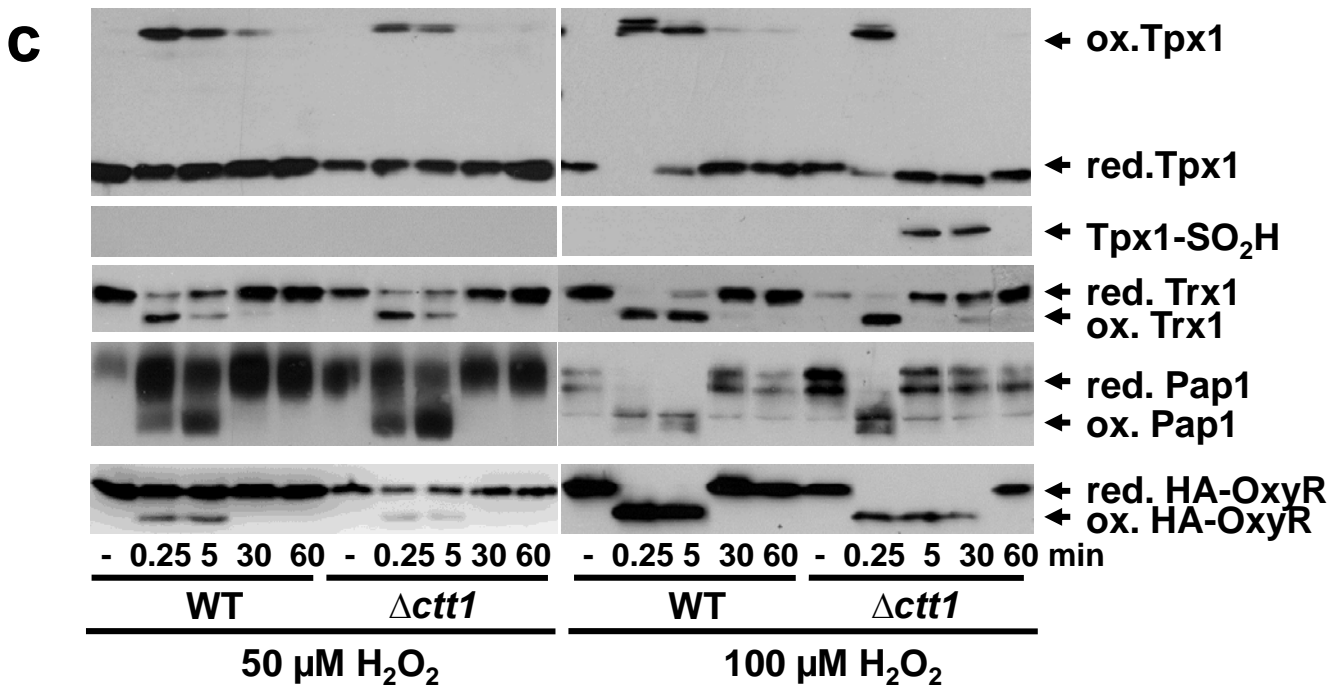

Domènech et al. Additional file 6: Figure S6
